# Supplementary material
Source: MDPI journal article supplement (https://www.mdpi.com/2311-5637/10/3/155)
Supplement: s1 [file s1]

**Table S1.** Inflammatory status in mice fed with a high-fat diet (HFD) and a standard diet (SD) with and without supplementation of FGM and mixes

| Groups      | TNF- $\alpha$                   | MCP-1                           | IL-6                            | IL-10                        |
|-------------|---------------------------------|---------------------------------|---------------------------------|------------------------------|
| Control     | 12.23 $\pm$ 9.75 <sup>a</sup>   | 8.60 $\pm$ 8.60 <sup>a</sup>    | 14.77 $\pm$ 1.24 <sup>a</sup>   | 8.08 $\pm$ 0.16 <sup>a</sup> |
| Control+FGM | 12.90 $\pm$ 3.20 <sup>a</sup>   | 5.55 $\pm$ 5.55 <sup>a</sup>    | 50.98 $\pm$ 4.93 <sup>ab</sup>  | 8.28 $\pm$ 0.02 <sup>a</sup> |
| Ob+ FGM     | 43.90 $\pm$ 10.16 <sup>b</sup>  | 58.97 $\pm$ 10.85 <sup>b</sup>  | 320.61 $\pm$ 85.23 <sup>c</sup> | 8.38 $\pm$ 0.16 <sup>a</sup> |
| Ob+FGM+Mix1 | 21.90 $\pm$ 10.90 <sup>ab</sup> | 19.20 $\pm$ 19.20 <sup>ab</sup> | 122.50 $\pm$ 9.20 <sup>b</sup>  | 8.29 $\pm$ 0.04 <sup>a</sup> |
| Ob+FGM+Mix2 | 24.95 $\pm$ 9.15 <sup>ab</sup>  | 13.37 $\pm$ 9.60 <sup>a</sup>   | 43.93 $\pm$ 6.06 <sup>ab</sup>  | 8.26 $\pm$ 0.18 <sup>a</sup> |
| Ob+FGM+Mix3 | 35.25 $\pm$ 1.15 <sup>ab</sup>  | 18.75 $\pm$ 2.95 <sup>ab</sup>  | 38.43 $\pm$ 19.76 <sup>ab</sup> | 8.39 $\pm$ 0.06 <sup>a</sup> |
| Ob+FGM+Mix4 | 31.10 $\pm$ 8.70 <sup>ab</sup>  | 37.10 $\pm$ 21.05 <sup>ab</sup> | 55.65 $\pm$ 17.25 <sup>ab</sup> | 8.28 $\pm$ 0.02 <sup>a</sup> |

Cytokines (pg mL<sup>-1</sup>). Data values (n=6) are shown as mean  $\pm$  standard error (SEM). Values with different superscript letters in the same column are significantly different (p < 0.05) as assessed by Tukey's test.

**Table S2.** Biochemical parameters of mice fed with a high-fat diet (HFD) or a standard diet (SD) with and without supplementation of FGM and mixes

| Groups      | Leptin                          | Glucose                        | TG                            | TC                            | LDL-c                         | HDL-c                                     |
|-------------|---------------------------------|--------------------------------|-------------------------------|-------------------------------|-------------------------------|-------------------------------------------|
| Control     | 92.71 $\pm$ 3,41 <sup>a</sup>   | 0.94 $\pm$ 0.04 <sup>abc</sup> | 0.26 $\pm$ 0.04 <sup>a</sup>  | 0.38 $\pm$ 0.02 <sup>a</sup>  | 0.26 $\pm$ 0.02 <sup>a</sup>  | 0.10 $\pm$ 0.01 <sup>a</sup>              |
| Control+FGM | 180.9 $\pm$ 37,67 <sup>a</sup>  | 1.13 $\pm$ 0.18 <sup>bcd</sup> | 0.24 $\pm$ 0.02 <sup>a</sup>  | 0.46 $\pm$ 0.01 <sup>ab</sup> | 0.32 $\pm$ 0.02 <sup>ab</sup> | 0.13 $\pm$ 0.01 <sup>b</sup>              |
| Ob+ FGM     | 1567 $\pm$ 133,80 <sup>cd</sup> | 1.61 $\pm$ 0.16 <sup>e</sup>   | 0.44 $\pm$ 0.05 <sup>c</sup>  | 0.54 $\pm$ 0.03 <sup>b</sup>  | 0.38 $\pm$ 0.03 <sup>ab</sup> | 0.10 $\pm$ 0.01 <sup>a</sup>              |
| Ob+FGM+Mix1 | 1819 $\pm$ 106,30 <sup>de</sup> | 1.22 $\pm$ 0.06 <sup>d</sup>   | 0.50 $\pm$ 0.05 <sup>c</sup>  | 0.57 $\pm$ 0.03 <sup>b</sup>  | 0.36 $\pm$ 0.05 <sup>ab</sup> | 0.15 $\pm$ 0.01 <sup>b</sup> <sup>c</sup> |
| Ob+FGM+Mix2 | 1444 $\pm$ 76.15 <sup>bc</sup>  | 0.92 $\pm$ 0.07 <sup>ab</sup>  | 0.29 $\pm$ 0.03 <sup>ab</sup> | 0.57 $\pm$ 0.07 <sup>b</sup>  | 0.32 $\pm$ 0.08 <sup>ab</sup> | 0.16 $\pm$ 0.01 <sup>c</sup>              |
| Ob+FGM+Mix3 | 1225 $\pm$ 55.38 <sup>b</sup>   | 0.83 $\pm$ 0.04 <sup>a</sup>   | 0.39 $\pm$ 0.04 <sup>bc</sup> | 0.59 $\pm$ 0.04 <sup>b</sup>  | 0.37 $\pm$ 0.05 <sup>ab</sup> | 0.16 $\pm$ 0.01 <sup>c</sup>              |
| Ob+FGM+Mix4 | 1967 $\pm$ 96,25 <sup>e</sup>   | 1.19 $\pm$ 0.06 <sup>cd</sup>  | 0.46 $\pm$ 0.04 <sup>c</sup>  | 0.57 $\pm$ 0.04 <sup>b</sup>  | 0.40 $\pm$ 0.04 <sup>b</sup>  | 0.13 $\pm$ 0.01 <sup>b</sup>              |

Leptin (pg mL<sup>-1</sup>); Glucose; TG: triglycerides; TC: total cholesterol; LDL-c: low-density lipoprotein cholesterol; HDL-c: high-density cholesterol; (g L<sup>-1</sup>). Data values (n=6) are shown as mean  $\pm$  standard error (SEM). Values with different superscript letters in the same column are significantly different (p < 0.05) as assessed by Tukey's test.
